# Supplementary material for: Polyphenol Profile, Antioxidant Activity, and Hypolipidemic Effect of Longan Byproducts
Source: MDPI journal article supplement (doi:10.3390/molecules28052083), 2023-02-23
Supplement: s1 [file s1]

## Raw western images

Figure S1: The original western blot images.

(1) PPAR $\alpha$

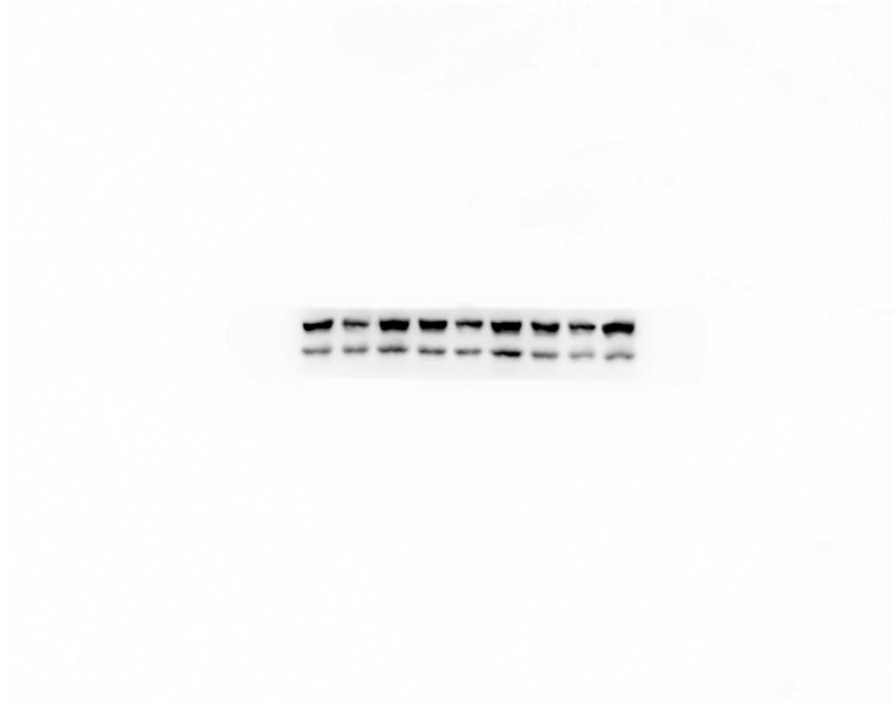

(2) LXR $\alpha$

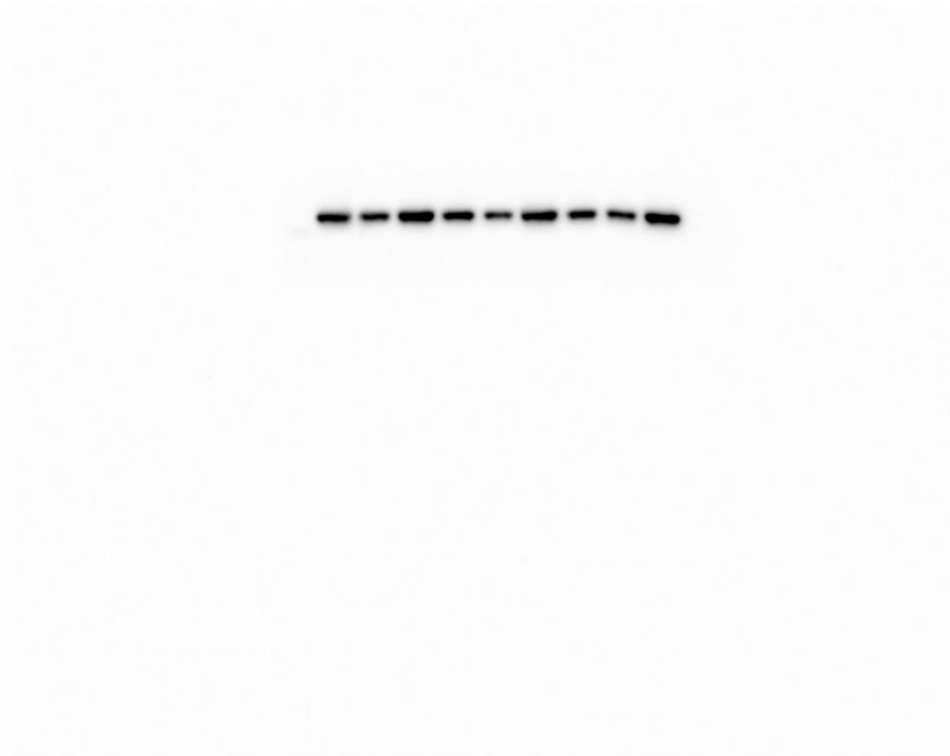

(3) FAS

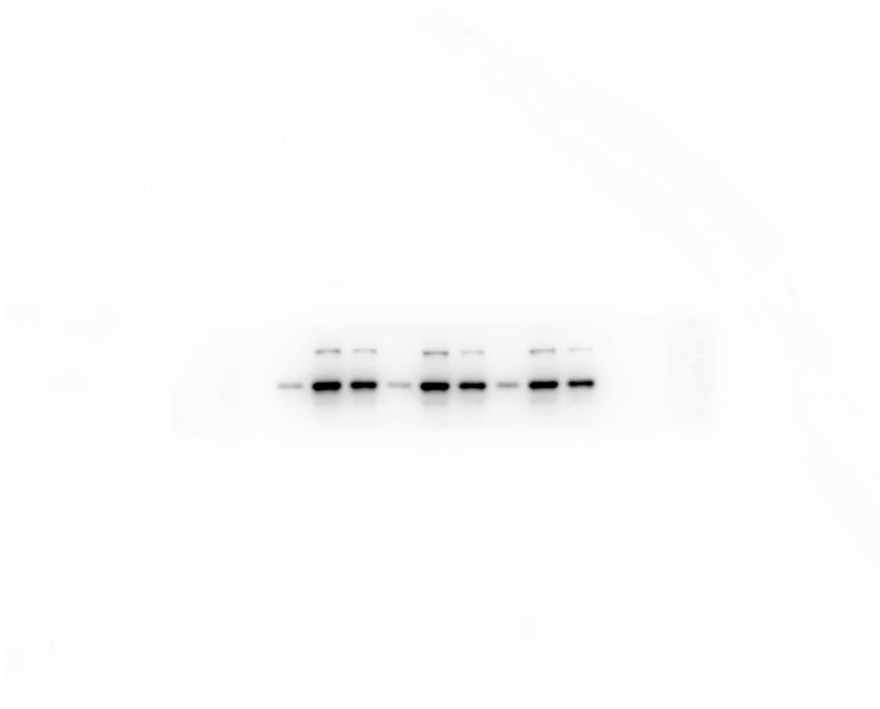

(4) CYP7A1

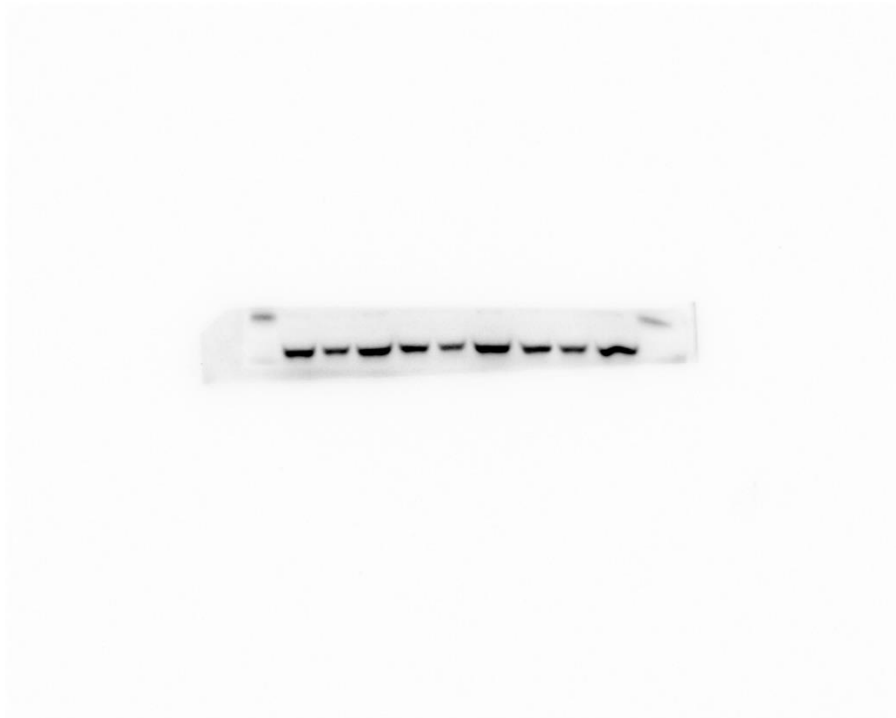

(5)  $\beta$ -actin

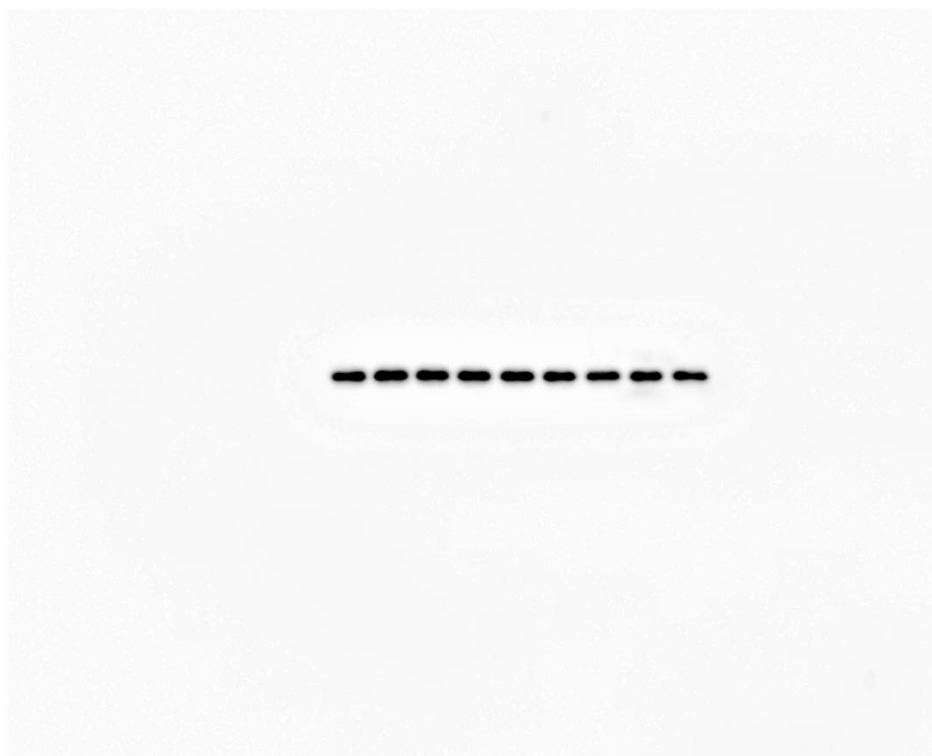

**Table S1. Densitometry Readings for all the bands.**

| Lane                            | 1    | 2    | 3    | 4    | 5    | 6    | 7    | 8    | 9    |
|---------------------------------|------|------|------|------|------|------|------|------|------|
| <b>PPAR<math>\alpha</math></b>  | 3072 | 930  | 4721 | 3536 | 1182 | 4991 | 2983 | 1374 | 5177 |
| <b>LXR<math>\alpha</math></b>   | 2391 | 563  | 5029 | 2156 | 632  | 5204 | 2259 | 639  | 5261 |
| <b>FAS</b>                      | 871  | 4473 | 3141 | 971  | 4393 | 3209 | 1162 | 4015 | 2970 |
| <b>CYP7A1</b>                   | 5008 | 1839 | 6321 | 4567 | 2267 | 6830 | 3634 | 1769 | 5475 |
| <b><math>\beta</math>-actin</b> | 4136 | 4485 | 4261 | 4254 | 4220 | 3999 | 3878 | 4052 | 3949 |
